# Supplementary material
Source: Springer Nature journal article supplement (https://www.springermedizin.de/resource/supplementary/12889_2011_3502_MOESM1_ESM.pdf/9489142)
Supplement: MOESM1 [file 9489142]

Allocation

Recruitment

Baseline survey  
(Aug. 2006)

1st follow-up  
(Nov. 2006,  
In detention)

2nd follow-up  
(Jan. 2007 – Oct. 2008,  
In community)

Analysis

**Eligibility** (9 drug rehabilitation centers)

**Convenience sampling** (2 centers)

**Control group** (1 center)  
816 Screened for eligibility

396 Excluded  
274 Not meeting inclusion criteria  
122 Refused to participate

420 **Recruited**

**Routine education**

**Assessment** ( $n=227$ )  
Knowledge only

**Assessment** ( $n=24$ )  
Knowledge and behavior

**1st follow-up** ( $n=227$ )  
**2nd follow-up** ( $n=99$ )

75 Included  
Undergone the same experience

**Intervention group** (1 center)  
353 Screened for eligibility

106 Excluded  
39 Not meeting inclusion criteria  
67 Refused to participate

247 **Recruited**

**Peer-based education**

**Assessment** ( $n=208$ )  
Knowledge only

**Assessment** ( $n=38$ )  
Knowledge and behavior

**1st follow-up** ( $n=208$ )  
**2nd follow-up** ( $n=38$ )
